# Supplementary material
Source: publisher figshare collection journal article supplement (https://brill.figshare.com/articles/dataset/_/27687516)
Supplement: Supplementary file 1 [file 1]

## Sheet: RMBFightDes_0147PM_06242024
GroupNum	Date	Site	Temp	MatingVib	MatingSqueak	CopYN	TimeToMate_min	TimeToMate_sec	AntFemYN	MountFemYN	FightingVib	FightingSqueak	TermBudContestsYN	TermBudContestsNum	MMMounts	H2HYN	H2HNum	H2HLength	HeadbuttYN	MMContacts	FootBatStartYN	FootBattingStart	MountStartYN	MountStart	FightNum	BiteYN	MMIntroAttemptYN	MMIntroAttempt	IntroLength	MPInterruptions	MatePersistYN	FlightRetreat	FlyOffYN	ChaseOffYN	PushOffYN	FallOffYN	ChaseYN	SurrenderYN	BehObserved	FightYN	TrialType	Notes
1	2022-07-12	Minooka	NA	NA	NA	1	07:13:00	433	1	1	NA	NA	NA	NA	NA	NA	NA	NA	NA	NA	NA	NA	NA	NA	NA	NA	NA	NA	NA	NA	NA	NA	NA	NA	NA	NA	NA	NA	mate	0	mf
2	2022-07-12	Minooka	NA	NA	NA	NA	NA	NA	0	0	NA	NA	NA	NA	NA	NA	NA	NA	NA	NA	NA	NA	NA	NA	NA	NA	NA	NA	NA	NA	NA	NA	NA	NA	NA	NA	NA	NA	NA	0	mf
3	2022-07-12	Richfield	NA	NA	NA	1	04:47:00	287	1	1	NA	NA	NA	NA	NA	NA	NA	NA	NA	NA	NA	NA	NA	NA	NA	NA	NA	NA	NA	NA	NA	NA	NA	NA	NA	NA	NA	NA	mate	0	mf
4	2022-07-12	Richfield	NA	NA	NA	NA	NA	NA	NA	NA	1	1	1	3	3	1	1	1	0	5	0	0	1	3	4	1	1	1	6	NA	NA	8	1	0	0	1	1	0	fight	1	mm
5	2022-07-12	Richfield	NA	NA	NA	0	NA	NA	0	0	1	1	1	2	2	0	0	NA	0	3	1	1	1	2	3	1	0	0	NA	0	0	0	0	0	0	0	0	1	fight	1	mmf
6	2022-07-13	Richfield	NA	NA	NA	NA	NA	NA	0	0	NA	NA	NA	NA	NA	NA	NA	NA	NA	NA	NA	NA	NA	NA	NA	NA	NA	NA	NA	NA	NA	NA	NA	NA	NA	NA	NA	NA	NA	0	mf
7	2022-07-13	UWM	NA	NA	NA	1	00:35:00	35	1	1	NA	NA	NA	NA	NA	NA	NA	NA	NA	NA	NA	NA	NA	NA	NA	NA	NA	NA	NA	NA	NA	NA	NA	NA	NA	NA	NA	NA	mate	0	mf
8	2022-07-13	UWM	NA	NA	NA	1	08:19:00	319	1	1	NA	NA	NA	NA	NA	NA	NA	NA	NA	NA	NA	NA	NA	NA	NA	NA	NA	NA	NA	NA	NA	NA	NA	NA	NA	NA	NA	NA	mate	0	mf
9	2022-07-13	UWM	NA	NA	NA	NA	NA	NA	NA	NA	1	0	1	4	2	0	0	NA	0	5	0	0	1	2	2	0	1	1	2	NA	NA	0	0	0	0	0	1	1	fight	1	mm
10	2022-07-13	Minooka	NA	NA	NA	1	09:18:00	558	1	1			0	0	0	0	0	NA	0	0	0	0	0	0	0	NA	NA	NA	NA	NA	NA	NA	NA	NA	NA	NA	NA	NA	mate	0	mmf
11	2022-07-14	UWM	20.4	NA	NA	1	00:44:00	44	1	1	1	0	0	0	1	1	3	1198	1	2	1	1	1	1	5	1	0	0	NA	1	1	0	0	0	0	1	1	0	mate-fight	1	mmf
12	2022-07-14	UWM	20.8	NA	NA	NA	NA	NA	NA	NA	NA	NA	0	0	0	0	0	NA	0	0	0	0	0	0	0	NA	NA	NA	NA	NA	NA	0	0	NA	NA	NA	NA	NA	NA	0	mm
13	2022-07-13	UWM	20.7	NA	NA	1	01:35:00	95	1	1	NA	NA	0	0	0	0	0	NA	0	0	0	0	0	0	0	NA	NA	NA	NA	NA	NA	NA	NA	NA	NA	NA	NA	NA	mate	0	mmf
15	2022-07-14	UWM	20.8	NA	NA	1	00:32:00	32	1	1	NA	NA	NA	NA	NA	NA	NA	NA	NA	NA	NA	NA	NA	NA	NA	NA	NA	NA	NA	NA	NA	NA	NA	NA	NA	NA	NA	NA	mate	0	mf
16	2022-07-15	UWM	18.2	NA	NA	1	18:07:00	907	1	1	1	0	0	0	0	0	0	NA	1	6	1	1	1	3	4	0	0	0	NA	4	1	0	0	0	0	0	0	1	mate-fight	1	mmf
17	2022-07-15	UWM	19.2	NA	NA	1	04:45:00	285	1	1	1	0	0	0	2	1	1	31	1	4	1	1	1	2	4	1	1	2	13	1	1	0	0	0	0	1	1	1	mate-fight	1	mmf
18	2022-07-15	UWM	19.2	NA	NA	1	18:23:00	1103	1	1	0	1	1	3	0	0	0	NA	0	3	0	0	1	1	1	0	0	0	NA	1	1	0	0	0	0	0	0	1	mate-fight	1	mmf
19	2022-07-15	UWM	19.7	NA	NA	0	NA	0	1	1	NA	NA	NA	NA	NA	NA	NA	NA	NA	NA	NA	NA	NA	NA	NA	NA	NA	NA	NA	NA	NA	NA	NA	NA	NA	NA	NA	NA	mate	0	mf
20	2022-07-15	UWM	19.9	NA	NA	1	02:57:00	177	1	1	NA	NA	0	0	0	0	0	NA	0	4	1	1	1	1	2	0	0	0	NA	1	1	0	0	0	0	0	0	1	mate-fight	1	mmf
21	2022-07-15	UWM	20.2	NA	NA	0	10:01:00	601	1	1	NA	NA	0	0	0	0	0	NA	0	0	0	0	0	0	0	NA	NA	NA	NA	NA	NA	NA	NA	NA	NA	NA	NA	NA	mate	0	mmf
22	2022-07-18	FS	20.3	NA	NA	NA	NA	NA	NA	NA	0	1	1	4	4	0	0	NA	1	7	1	1	1	4	5	1	0	0	NA	NA	NA	0	0	0	0	0	1	1	fight	1	mm
23	2022-07-18	FS	21	NA	NA	NA	NA	NA	NA	NA	1	0	0	0	1	0	0	NA	1	3	1	1	1	1	2	0	0	0	NA	NA	NA	0	0	0	0	1	0	1	fight	1	mm
24	2022-07-18	FS	20.6	NA	NA	NA	NA	NA	NA	NA	0	1	1	1	2	0	0	NA	0	5	1	3	1	2	5	0	0	0	NA	NA	NA	0	0	0	0	0	1	1	fight	1	mm
25	2022-07-18	UWM&FS	20.7	NA	NA	1	00:58:00	58	1	1	0	1	1	5	0	0	0	NA	0	10	1	1	1	1	2	0	0	0	NA	5	1	0	0	0	0	0	0	1	mate-fight	1	mmf
26	2022-07-18	FS	21	NA	NA	NA	NA	NA	NA	NA	0	1	1	5	3	0	0	NA	0	10	1	2	1	2	4	0	1	1	10	NA	NA	0	0	0	1	1	1	1	fight	1	mm
27	2022-07-18	FS	21.2	NA	NA	NA	NA	NA	NA	NA	1	1	1	3	2	0	0	NA	0	5	1	3	1	2	5	0	1	1	23	NA	NA	0	0	0	1	1	1	1	fight	1	mm
28	2022-07-18	FS	21.5	NA	NA	NA	NA	NA	NA	NA	N	1	1	3	2	0	0	NA	1	6	1	1	1	2	3	0	1	1	10	NA	NA	0	0	0	1	0	1	1	fight	1	mm
29	2022-07-19	UEC&FS	22	NA	NA	NA	NA	NA	NA	NA	NA	NA	0	0	0	0	0	NA	0	0	0	0	0	0	0	NA	NA	NA	NA	NA	NA	0	0	NA	NA	NA	NA	NA	NA	0	mm
30	2022-07-19	UEC&FS	22.6	NA	NA	NA	NA	NA	NA	NA	NA	NA	0	0	0	0	0	NA	0	0	0	0	0	0	0	NA	NA	NA	NA	NA	NA	0	0	NA	NA	NA	NA	NA	NA	0	mm
31	2022-07-19	UEC	23.1	1	1	1	01:41:00	101	0	1	1	1	1	3	0	0	0	NA	1	7	1	2	1	3	5	1	0	0	NA	3	1	0	0	0	0	1	1	1	mate-fight	1	mmf
32	2022-07-19	UEC&FS	24.3	1	0	1	09:03:00	543	0	1	0	0	0	0	0	0	0	NA	0	0	0	0	0	0	0	NA	NA	NA	NA	NA	NA	NA	NA	NA	NA	NA	NA	NA	mate	0	mmf
33	2022-07-19	UEC	24.7	1	1	1	06:47:00	407	1	1	1	1	1	2	0	0	0	NA	0	2	1	1	1	1	2	1	0	0	NA	1	1	0	0	0	0	0	1	1	mate-fight	1	mmf
34	2022-07-19	UEC	25.1	NA	NA	NA	NA	NA	NA	NA	1	1	1	2	1	0	0	NA	1	3	0	0	1	1	1	0	0	0	NA	NA	NA	1	1	0	1	0	1	0	fight	1	mm
35	2022-07-19	UEC	25.3	NA	NA	NA	NA	NA	NA	NA	1	1	1	4	1	0	0	NA	1	6	1	2	1	2	4	1	1	1	2	NA	NA	1	1	0	0	0	0	1	fight	1	mm
36	2022-07-21	BradyCorp	25.3	1	1	1	00:37:00	37	0	1	NA	NA	0	0	0	0	0	NA	0	0	0	0	0	0	0	NA	NA	NA	NA	NA	NA	NA	NA	NA	NA	NA	NA	NA	mate	0	mmf
37	2022-07-21	BradyCorp	25.6	0	0	1	NA	NA	0	0	1	0	1	5	1	0	0	NA	1	10	1	1	1	4	5	1	1	1	10	6	1	0	0	0	1	0	1	1	mate-fight	1	mmf
38	2022-07-21	BradyCorp	26.2	NA	NA	NA	NA	NA	0	0	NA	NA	0	0	0	0	0	NA	0	0	0	0	0	0	0	NA	NA	NA	NA	NA	NA	0	0	NA	NA	NA	NA	NA	NA	0	mmf
39	2022-07-21	BradyCorp	26.5	1	1	0	NA	NA	0	0	1	1	1	5	4	0	0	NA	1	10	1	6	1	2	8	1	1	2	109	0	0	2	1	0	1	0	1	1	fight	1	mmf
40	2022-07-22	BradyCorp	24.7	0	0	1	00:14:00	14	1	1	1	1	1	3	2	0	0	NA	1	5	0	0	1	2	2	1	0	0	NA	1	1	0	0	0	1	0	1	1	mate-fight	1	mmf
41	2022-07-22	BradyCorp	25.1	NA	NA	0	NA	0	0	1	NA	NA	0	0	0	0	0	NA	0	0	0	0	0	0	0	NA	NA	NA	NA	NA	NA	2	1	NA	NA	NA	NA	NA	mate	0	mmf
42	2022-07-28	UEC	24.6	NA	NA	NA	NA	NA	NA	NA	1	0	0	0	1	0	0	NA	0	1	0	0	1	1	1	0	1	1	10	NA	NA	2	1	0	0	0	0	1	fight	1	mm
43	2022-07-28	UEC	24.6	NA	NA	NA	NA	NA	NA	NA	1	0	0	0	2	0	0	NA	0	6	1	2	1	2	4	0	0	0	NA	NA	NA	0	0	0	0	0	0	1	fight	1	mm
44	2024-07-28	UEC	24.8	NA	NA	NA	NA	NA	0	0	NA	NA	NA	NA	NA	NA	NA	NA	NA	NA	NA	NA	NA	NA	NA	NA	NA	NA	NA	NA	NA	NA	NA	NA	NA	NA	NA	NA	mate	0	mf
45	2022-07-28	UEC	24.9	1	1	1	01:20:00	80	1	1	1	0	1	2	0	0	0	NA	1	7	1	1	0	0	1	0	0	0	NA	0	0	0	0	0	0	0	1	1	mate-fight	1	mmf
46	2022-07-28	UEC	24.8	NA	NA	NA	NA	NA	NA	NA	1	1	1	2	2	0	0	NA	0	2	0	0	1	2	2	0	1	1	17	NA	NA	0	0	0	0	0	0	1	fight	1	mm
47	2022-07-28	UEC	25	0	0	1	10:53:00	653	1	1	0	0	0	0	0	0	0	NA	0	0	0	0	0	0	0	NA	NA	NA	NA	NA	NA	NA	NA	NA	NA	NA	NA	NA	mate	0	mmf
48	2022-07-29	UEC&UWM	24.5	1	0	1	01:15:00	75	1	1	NA	NA	NA	NA	NA	NA	NA	NA	NA	NA	NA	NA	NA	NA	NA	NA	NA	NA	NA	NA	NA	NA	NA	NA	NA	NA	NA	NA	mate	0	mf
49	2022-07-29	UEC&UWM	24.4	1	1	1	00:39:00	39	1	1	NA	NA	NA	NA	NA	NA	NA	NA	NA	NA	NA	NA	NA	NA	NA	NA	NA	NA	NA	NA	NA	NA	NA	NA	NA	NA	NA	NA	mate	0	mf
50	2022-07-29	UEC&UWM	24.5	0	0	1	02:17:00	137	1	1	1	0	0	0	0	0	0	NA	0	2	0	0	1	1	1	0	1	1	1269	1	1	0	0	0	0	0	0	1	mate-fight	1	mmf
51	2022-07-29	UWM	24.8	NA	NA	NA	NA	NA	NA	NA	1	1	1	9	5	0	0	NA	1	12	0	0	1	7	7	1	0	0	NA	NA	NA	0	0	0	1	0	1	1	fight	1	mm
52	2022-07-29	UEC&UWM	24.6	1	1	1	19:26:00	1166	1	1	1	1	1	2	0	0	0	NA	0	2	0	0	1	1	1	0	1	1	50	2	1	0	0	0	0	0	0	1	mate-fight	1	mmf
53	2022-07-29	UEC	24.7	NA	NA	NA	NA	NA	NA	NA	1	1	1	3	1	1	1	27	1	4	1	2	0	0	3	1	0	0	NA	NA	NA	1	1	0	1	0	1	1	fight	1	mm
